# Supplementary material for: Differential effects of early growth conditions on colour-producing nanostructures revealed through small angle X-ray scattering (SAXS) and electron microscopy
Source: Oxford University Press journal article supplement (doi:10.1242/jeb.228387), 2020-01-01
Supplement: jeb228387supp.pdf [file jeb228387supp.pdf]

## Supplementary material

**Table S1.** Number of nests and individuals in each experimental group in a given breeding season.

|                     | Nests | Nestlings: | Early 1 | Early 2 | Late | Control | All nestlings |
|---------------------|-------|------------|---------|---------|------|---------|---------------|
| <b>2017</b>         | 24    |            | 54      | 54      | 51   | 55      | 214           |
| <b>2018</b>         | 20    |            | 52      | 52      | 52   | 50      | 206           |
| <b>Both Seasons</b> | 44    |            | 106     | 106     | 103  | 105     | 420           |

**Table S2.** Values of PC loading for variables characterizing microstructure of barb's cross-sections.

| Variable            | PC1   | PC2   |
|---------------------|-------|-------|
| height              | -0.89 | 0.14  |
| width               | -0.69 | 0.24  |
| total area          | -0.97 | 0.13  |
| medullary area      | -0.96 | 0.03  |
| cortex area         | -0.82 | 0.27  |
| no. of vacuoles     | -0.71 | 0.02  |
| vacuoles area       | -0.82 | 0.04  |
| melanosomes         | -0.63 | -0.76 |
| melanosomes density | -0.25 | -0.96 |

**Table S3.**

Results of the linear mixed models showing effects of experimental double-stage brood size manipulation on red chroma of tail feathers. The model included experimental group, year and sex as fixed factors and nest of rearing as a random term. Reference levels for fixed effects: exp. group – CONTROL; sex – female; year – 2017.

|                   | Estimate | SE    | df      | t       | p          |
|-------------------|----------|-------|---------|---------|------------|
| <b>Red chroma</b> |          |       |         |         |            |
| Intercept         | -5.769   | 4.597 | 31.880  | -1.255  | 0.219      |
| Early1            | 0.003    | 0.003 | 32.270  | 0.904   | 0.372      |
| EarlyY2           | 0.000    | 0.003 | 32.060  | 0.904   | 0.935      |
| Late              | 0.005    | 0.003 | 29.680  | 1.708   | 0.098      |
| Sex: Males        | -0.013   | 0.001 | 274.300 | -10.262 | <0.001 *** |
| year              | 0.003    | 0.001 | 31.880  | 1.303   | 0.202      |

**Table S4.** Mean value and standard deviation of **A.** nestlings mass, tarsus length, tail feathers morphometrics and colour metrics (\*sample size of colour metrics measurements was 164 and 141 for males and females, respectively), averaged within sex; **B.** tail feather barb cross-section microstructure variables; **C.** small angle X-ray scattering (SAXS) metrics. **B.** Analysis of barbs microstructure characteristics was performed on subsample of 3 randomly chosen nestlings from each experimental nest, therefore the sample size within each sex is given in brackets in column headings. **C.** SAXS analysis was performed on a subset of tail feathers from the 2017 season, thus the sample size within sex is given in brackets in column headings.

| <b>A.</b>            | <b>Males (n = 222)</b> | <b>Females (n = 205)</b> |
|----------------------|------------------------|--------------------------|
| mass                 | 10.97 ± 1.15           | 10.97 ± 1.15             |
| tarsus length        | 16.79 ± 0.62           | 16.79 ± 0.62             |
| rectrix length       | 31.87 ± 4.15           | 31.86 ± 4.15             |
| rectrix sheath       | 14.00 ± 1.74           | 13.99 ± 1.73             |
| erupted part         | 17.89 ± 4.08           | 17.89 ± 4.08             |
| tail brightness*     | 4608.13 ± 686.36       | 4608.14 ± 686.35         |
| Tail UV chroma*      | 0.28 ± 0.02            | 0.28 ± 0.02              |
| <b>B.</b>            | <b>Males (n = 69)</b>  | <b>Females (n = 46)</b>  |
| Height               | 65.24 ± 11.56          | 65.12 ± 11.42            |
| Width                | 18.23 ± 2.64           | 18.19 ± 2.60             |
| Total area           | 808.38 ± 252.95        | 803.45 ± 247.36          |
| Medullary area       | 433.43 ± 160.57        | 430.93 ± 157.68          |
| Cortex area          | 379.17 ± 114.15        | 376.75 ± 112.02          |
| No vacuoles          | 4.44 ± 1.39            | 4.43 ± 1.38              |
| Vacuoles area        | 167.45 ± 75.02         | 166.71 ± 74.01           |
| Melanosomes          | 94.32 ± 68.75          | 92.72 ± 67.68            |
| Melanosomes per area | 0.12 ± 0.07            | 0.11 ± 0.07              |
| <b>C.</b>            | <b>Males (n = 95)</b>  | <b>Females (n = 53)</b>  |
| Maximum peak height  | 9.79E-12 ± 3.67E-12    | 9.81E-12 ± 3.67E-12      |
| Peak position        | 3.03E-03 ± 1.95E-04    | 3.02E-03 ± 1.96E-04      |
| Peak FWHM            | 3.20E-03 ± 2.97E-04    | 3.20E-03 ± 2.98E-04      |

## Figures

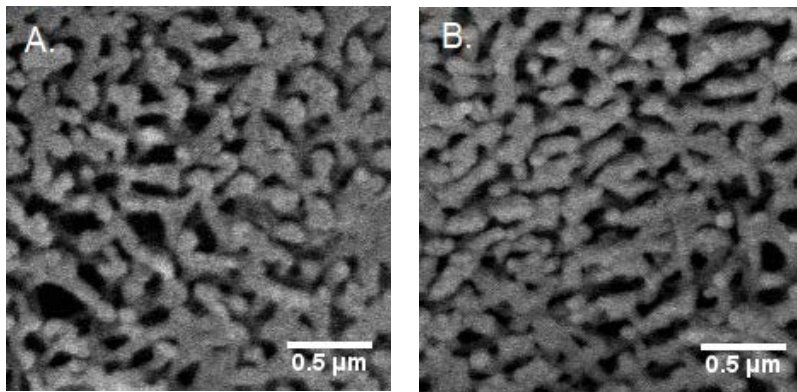

**Fig. S1.** SEM micrographs of the female (A.) and male (B.) rectrix barb cross-section, showing fragment with keratin spongy structure.

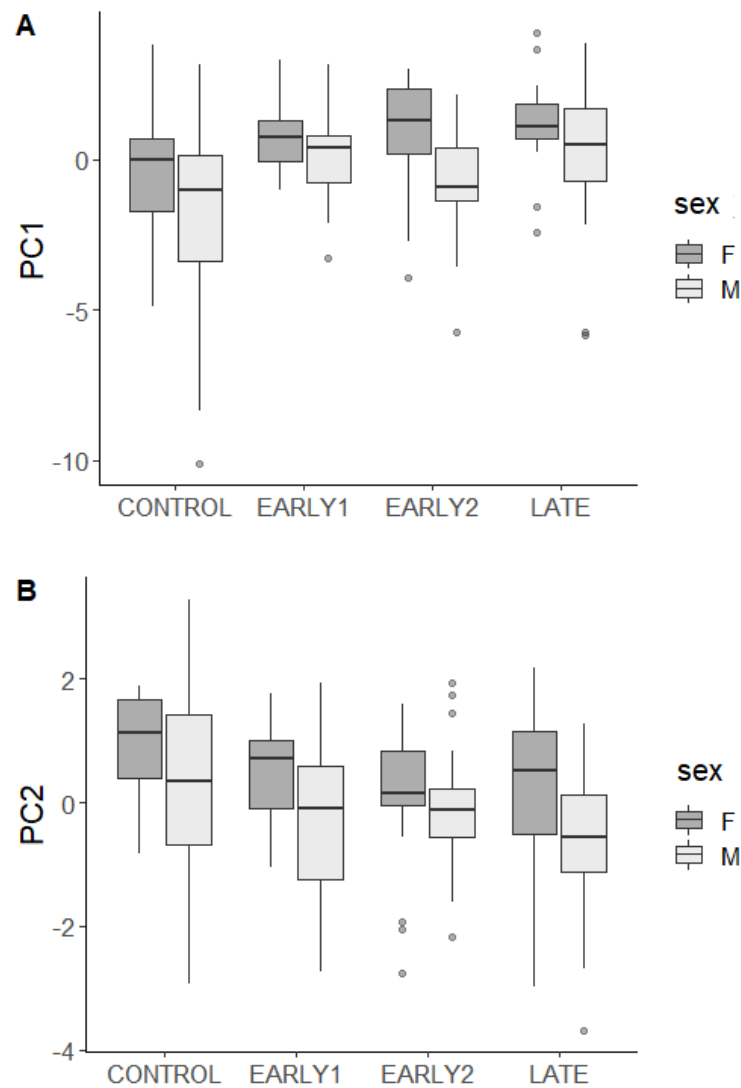

**Figure S2.** Differences in PC1 (A), and PC2 (B) between experimental groups. “Early1” indicate the group in which broods were enlarged at day 2 and left without further manipulation until fledging, in the group “Early2” broods were enlarged at day 2, and subsequently reduced at day 6, in the group “Late” broods were enlarged at day 6, and “Control” was the group with not manipulated broods. Black horizontal bars indicate median, whiskers indicate minimum and maximum values, dark grey and light grey colours denote, respectively, females and males.
